# Supplementary material for: Impact and Lessons From the Lifestyle Interventions and Independence for Elders (LIFE) Clinical Trials of Physical Activity to Prevent Mobility Disability
Source: PubMed Central journal article supplement — J Am Geriatr Soc. 2020 Feb 27;68(4):872–81. doi: 10.1111/jgs.16365 (PMC7187344; doi:10.1111/jgs.16365), 2020-02-27
Supplement: JGS-68-872-s001.pdf [file JGS-68-872-s001.pdf]

## LIFE Online Supplemental description of study committees

To ensure the coordinated functioning of the project we organized the following committees, which mainly met by conference call on a monthly basis. A web-based administrative tracking and monitoring system was used to facilitate the flow of information and increase the level of communication. The Steering Committee was charged with the overall governance of study conduct. The Executive Committee was responsible for negotiating budgets, the fiscal management of the trial, allocating resources based on pre-set budgets and on performance of individual Field and Support Centers, and evaluating and reporting on progress, timeline benchmarks and deliverables. The Administrative Coordinating Center facilitated the flow of information and communication among all committees, and performed other administrative tasks. The Data Management, Analysis, and Quality Control was responsible of all data-related aspects. The Lifestyle Resource Core and the Intervention and Operations Committees were responsible for monitoring the quality control, implementation, and adherence to the interventions. The Field Centers implemented recruitment, intervention, and follow-up procedures. The Publications and Presentations Committee encourage and monitored the production of publications and presentations. The Emerging Science Committee monitored the literature, scientific meetings and input received from colleagues on the cutting-edge science related to the project, and reviewed ancillary studies. The Measurement and Event Adjudication Committee developed and ensured quality control of the assessments. The Medical Safety Committee reviewed the overall safety of study. The Recruitment, Adherence and Retention Committee implemented strategies for recruitment, adherence and retention of study participants.

**Supplemental Table S1: LIFE and LIFE-P Published Manuscripts****2019**

1. Groessl EJ, Kaplan RM, Rejeski WJ, Katula JA, Glynn NW, King AC, Anton SD, Walkup M, Lu CJ, Reid KF, Spring B, Pahor M. Physical Activity and Performance Impact Long-term Quality of Life in Older Adults at Risk for Major Mobility Disability. *Am J Prev Med.* 2019 Jan;56(1):141-146.

**2018**

2. Bielak AAM, Brydges CR. Can Intraindividual Variability in Cognitive Speed be Reduced by Physical Exercise? Results from the LIFE Study. *J Gerontol B Psychol Sci Soc Sci.* 2018 Aug 30. doi: 10.1093/geronb/gby101. [Epub ahead of print].
3. Buford TW, Manini TM, Kairalla JA, McDermott MM, Vaz Fragoso CA, Chen H, Fielding RA, King AC, Newman AB, Tranah GJ. Mitochondrial DNA Sequence Variants Associated With Blood Pressure Among 2 Cohorts of Older Adults. *J Am Heart Assoc.* 2018 Sep 18;7(18). PMID: PMC6222953.
4. Callahan K, Fielding R, Gill T, Groessl E, Guralnik J, King A, Kritchevsky S, Lovato L, Manini T, Marsh A, McDermott M, Miller M, Newman A, Rejeski J. Self-Reported Physical Function As a Predictor of Hospitalization in the Lifestyle Interventions and Independence for Elders Study. *J Am Geriatr Soc.* 2018 Oct;66(10):1927-1933. PMID: PMC6277208.
5. Chen H, Ambrosius W, Blair S, Gill T, Guralnik J, King A, Liu C, Manini T, Miller M, Newman A, Pahor M, Rejeski J, Conroy D. Comparison of Self-Report Indices of Major Mobility Disability to Failure on the 400-Meter Walk Test: The LIFE Study. *J Gerontol A Biol Sci Med Sci.* 2018 Mar 14;73(4):513-518. PMID: PMC5861858.
6. Datta R, Tretalage M, Van Ness P, McGloin J, Guralnik J, Miller M, Walkup M, Nadkarni N, Pahor M, Gill T, Gill TM, Quagliarello V, Juthani-Mehta M, For the LIFE Study Group. Serious adverse events of older adults in nursing home and community intervention trials. *Contemporary Clinical Trials Communications.* 2018. Mar: 9: 77-80. PMID: PMC5898490.
7. Henderson RM, Miller ME, Fielding RA, Gill TM, Glynn NW, Guralnik JM, King A, Newman AB, Manini TM, Marsh AP, Pahor M, McDermott MM, Rejeski J, Tudor-Locke C, Kritchevsky SB; LIFE Study Investigators. Maintenance of Physical Function 1 Year After Exercise Intervention in At-Risk Older Adults: Follow-up From the LIFE Study. *J Gerontol A Biol Sci Med Sci.* 2018 Apr 17;73(5):688-694. PMID: PMC5905630.
8. Liu Z, Hsu FC, Trombetti A, King AC, Liu CK, Manini TM, Fielding RA, Pahor M, Newman AB, Kritchevsky S, Gill TM; LIFE Study investigators. Effect of 24-month physical activity on cognitive frailty and the role of inflammation: the LIFE randomized clinical trial. *BMC Med.* 2018 Oct 24;16(1):185. PMID: PMC6199791.
9. Manini TM, Buford TW, Kairalla JA, McDermott MM, Vaz Fragoso CA, Fielding RA, Hsu FC, Johannsen N, Kritchevsky S, Harris TB, Newman AB, Cummings SR, King AC, Pahor M, Santanasto AJ, Tranah GJ. Meta-analysis identifies mitochondrial DNA sequence variants associated with walking speed. *GeroScience.* 2018 Dec; 40(5-6): 497–511. PMID: PMC6294723.
10. Miller ME, Magaziner J, Marsh AP, Fielding RA, Gill TM, King AC, Kritchevsky S, Manini T, McDermott MM, Neiberg R, Orwig D, Santanasto AJ, Pahor M, Guralnik J, Rejeski WJ; LIFE Investigators. Gait Speed and Mobility Disability: Revisiting Meaningful Levels in Diverse Clinical Populations. *J Am Geriatr Soc.* 2018 May;66(5):954-961. PMID: PMC5992037.
11. Rejeski J, Axtell R, Buman M, Fielding R, King A, Manini T, Marsh A, McDermott M, Miller E, Newman A, Tudor-locke C, Walkup M. Evaluating Accelerometry Thresholds for Detecting Changes in Levels of Moderate Physical Activity and Resulting Major Mobility Disability. *J Gerontol A Biol Sci Med Sci.* 2018 Apr 17;73(5):660-667. PMID: PMC5905614.
12. Rosso AL, Metti AL, Glynn NW, Boudreau RM, Rejeski WJ, Bohnen N, Chen H, Johannsen NM, King AC, Manini TM, Pahor M, Studenski SA, Fragoso CAV, Rosano C, LIFE Study Group. Dopamine-Related Genotypes and Physical Activity Change During an Intervention: The Lifestyle Interventions

and Independence for Elders Study. *J Am Geriatr Soc.* 2018 Jul;66(6):1172-1179. PMID: PMC6105503.

13. Trombetti A, Church T, Fielding R, Gill T, Guralnik J, Hsu F, King A, Liu C, Manini T, McDermott M, Newman A, Pahor M, Reid K, Rejeski J. Effect of Physical Activity on Frailty and Associated Negative Outcomes: A Secondary Analysis of the LIFE Randomized Controlled Trial. *Ann Intern Med.* 2018 Mar 6;168(5):309-316. PMID: PMC5898617.
14. Wanigatunga AA, Gill TM, Marsh AP, Hsu FC, Yaghjyan L, Woods AJ, Glynn NW, King AC, Newton RL Jr, Fielding RA, Pahor M, Manini TM; Lifestyles Intervention and Independence for Elders Study Investigators. Effect of Hospitalizations on Physical Activity Patterns in Mobility-Limited Older Adults. *J Am Geriatr Soc.* 2018 Nov 19. doi: 10.1111/jgs.15631. [Epub ahead of print].
15. Wasson E, Rosso AL, Santanasto AJ, Rosano C, Butters MA, Jack Rejeski W, Boudreau RM, Aizenstein H, Gmelin T, Glynn NW; LIFE Study Group. Neural correlates of perceived physical and mental fatigability in older adults: A pilot study. *Exp Gerontol.* 2018 Dec 4. pii: S0531-5565(18)30504-7. doi: 10.1016/j.exger.2018.12.003. [Epub ahead of print].

## 2017

16. Aubertin-Leheudre M, Anton S, Beavers D, Botoseneau A, Church T, Fielding R, Hauser M, Kritchevsky S, Manini T, McDermott M, Newman A, Pahor M. Dynapenia and Metabolic Health in Obese and Nonobese Adults Aged 70 Years and Older: The LIFE Study. *J Am Med Dir Assoc.* 2017 Apr 1;18(4):312-319. PMID: PMC5366275.
17. Botoseneau A, Chen H, Ambrosius W, Allore HG, Anton S, Folta S, King A, Nicklas B, Spring B, Strotmeyer E, Gill TM, LIFE Study Group. Effect of Metabolic Syndrome on the Mobility Benefit of a Structured Physical Activity Intervention-The Lifestyle Interventions and Independence for Elders Randomized Clinical Trial. *J Am Geriatr Soc.* 2017 Jun;65(6):1244-1250. PMID: PMC5478451
18. Chen H, Ambrosius W, Fielding R, Miller M, Murphy T, Pahor M, Rejeski J, Santanasto A, Tudor-Locke C. Imputation of Gait Speed for Noncompleters in the 400-Meter Walk: Application to the Lifestyle Interventions for Elders Study. *J Am Geriatr Soc.* 2017 Dec. 65(12), pp. 2566-2571.
19. Cochrane SK, Chen SH, Fitzgerald JD, Dodson JA, Fielding RA, King AC, McDermott MM, Manini TM, Marsh AP, Newman AB, Pahor M, Tudor-Locke C, Ambrosius WT, Buford TW, LIFE Study Research Group. Association of Accelerometry-Measured Physical Activity and Cardiovascular Events in Mobility-Limited Older Adults: The LIFE (Lifestyle Interventions and Independence for Elders) Study. *J Am Heart Assoc.* 2017 Dec; 6(12): e007215.
20. Corbett DB, Rejeski WJ, Tudor-Locke C, Glynn NW, Kritchevsky SB, McDermott MM, Church TS, Fielding RA, Gill TM, King AC, Miller ME, Chen H, Pahor M, Manini TM; LIFE Study Investigators. Social Participation Modifies the Effect of a Structured Physical Activity Program on Major Mobility Disability Among Older Adults: Results From the LIFE Study. *J Gerontol B Psychol Sci Soc Sci.* 2018 Oct 10;73(8):1501-1513. PMID: PMC6178963.
21. Espeland MA, Lipska K, Miller ME, Rushing J, Cohen RA, Verghese J, McDermott MM, King AC, Strotmeyer ES, Blair SN, Pahor M, Reid K, Demons J, Kritchevsky SB; LIFE Study Investigators. Effect of Lifestyle Intervention on Physical and Cognitive Function in Sedentary Adults with and without Diabetes. *J Gerontol A Biol Sci Med Sci.* 2017 Jun 1;72(6):861-866.
22. Fielding R, Axtell R, Glynn N, Guralnik J, King A, Manini T, Marsh A, McDermott M, Pahor M, Rejeski J, Tudor-Locke C. Dose of physical activity, physical functioning and disability risk in mobility-limited older adults: Results from the LIFE study randomized trial. *PLoS ONE* 12(8): e0182155. <https://doi.org/10.1371/journal.pone.0182155>. PMID: PMC5562326.
23. Gill T, Applegate W, Beavers D, Fielding R, Guralnik J, Manini T, Marsh A, McDermott M, Miller M, Newman A, Pahor M, Allore H, Hauser M. The effect of intervening hospitalizations on the benefit of structured physical activity in promoting independent mobility among community-living older persons: secondary analysis of a randomized controlled trial. *BMC Med.* 2017; 15: 65.
24. King AC, Salvo D, Banda JA, Ahn DK, Chapman JE, Gill TM, Fielding RA, Demons J, Tudor-Locke C, Rosso A, Pahor M, Frank LD. Preserving older adults' routine outdoor activities in contrasting neighborhood environments through a physical activity intervention. *Prev Med.* 2017 Mar;96:87-93.

25. Kritchevsky S, Blair S, Botoseneanu A, Guralnik J, King A, Liu C, Lovato L, Manini T, Marsh A, Newman A, Pahor M, Rejeski J, Spring B. The Effects of Exercise on Mobility Disability in Obese, Abdominally Obese and Non Obese Older Adults. *Obesity (Silver Spring)*. 2017 Jul;25(7):1199-1205
26. Layne A, Buford T, Blair S, Church T, Dungan J, Fielding R, Glynn N, Hajduk A, Hsu F, King A, Manini T, Marsh A, Pahor M, Pellegrini C. Predictors of Change in Physical Function in Older Adults in Response to Long-Term, Structured Physical Activity: The LIFE Study. *Arch Phys Med Rehabil*. 2017 Jan;98(1):11-24.
27. Liu CK, Milton, J, Hsu F-C, Beavers KM, Yank V, Church T, Shegog JD, Kashaf S, Nayfield S, Newman A, Stafford RS, Nicklas B, Weiner DE, Fielding RA, and LIFE-P Research Group. The Effect of Chronic Kidney Disease on a Physical Activity Intervention: Impact on Physical Function, Adherence, and Safety. *J Clin Nephrol Ren Care*. 2017;3(1). pii: 21. PMID: PMC5937279.
28. Manini TM, Beavers DP, Pahor M, Guralnik JM, Spring B, Church TS, King AC, Folta SC, Glynn NW, Marsh AP, Gill TM; LIFE study investigators. Effect of Physical Activity on Self-Reported Disability in Older Adults: Results from the LIFE Study. *J Am Geriatr Soc*. 2017 May;65(5):980-988.
29. Mankowski R, Anton S, Axtell R, Chen S-H, Fielding R, Glynn N, Hsu F-C, King A, Leeuwenburgh C, Manini T, Marsh A, Pahor M, Tudor-Locke C, Conroy D. Device-measured physical activity as a predictor of mobility disability among mobility-limited older adults. *J Am Geriatr Soc*. 2017 Oct;65(10):2251-2256.
30. Rosano C, Guralnik J, Pahor M, Glynn NW, Newman AB, Ibrahim TS, Erickson K, Cohen R, Shaaban CE, MacCloud RL, Aizenstein HJ. Hippocampal Response to a 24-Month Physical Activity Intervention in Sedentary Older Adults. *Am J Geriatr Psychiatry*. 2017 Mar;25(3):209-217. PMID: PMC5568026.
31. Santanasto A, Blair S, Fielding R, Gill T, Glynn N, Guralnik J, Hsu F, King A, Lovato L, Manini T, Marsh A, McDermott M, Newman A, Pahor M, Strotmeyer E. The Effect of Long Term Physical Activity or Health Education on Grip Strength, Chair-Rise Time, Gait Speed, and Balance. *J Am Geriatr Soc*. 2017 Jul;65(7):1427-1433.
32. Shaaban CE, Aizenstein HJ, Jorgensen DR, MacCloud RL, Meckes NA, Erickson KI, Glynn NW, Mettenburg J, Guralnik J, Newman AB, Ibrahim TS, Laurienti PJ, Vallejo AN, Rosano C; LIFE Study Group. In Vivo Imaging of Venous Side Cerebral Small-Vessel Disease in Older Adults: An MRI Method at 7T. *AJNR Am J Neuroradiol*. 2017 Oct;38(10):1923-1928. PMID: PMC5632121.
33. Wanigatunga AA, Ambrosius WT, Rejeski WJ, Gill TM, Glynn NW, Tudor-Locke C, Manini TM. Association Between Structured Physical Activity and Sedentary Time in Older Adults. *JAMA*. 2017 Jul 18;318(3):297-299.
34. Wanigatunga A, Axtell R, Fielding R, Glynn N, King A, Manini T, McDermott M, Pahor M, Tudor-Locke C. Effects of a Long-Term Physical Activity Program on Activity Patterns in Older Adults. *Med Sci Sports Exerc*. 2017 Nov;49(11):2167-2175.

## 2016

35. Bann D, Chen H, Bonell C, Glynn NW, Fielding RA, Manini T, King AC, Pahor M, Mihalko SL, Gill TM; Life Study investigators. Socioeconomic differences in the benefits of structured physical activity compared with health education on the prevention of major mobility disability in older adults: the LIFE study. *J Epidemiol Community Health*. 2016 Sep;70(9):930-3. PMID: PMC5013156.
36. deFilippi CR, de Lemos JA, Newman AB, Guralnik JM, Christenson RH, Pahor M, Church T, Espeland M, Kritchevsky SB, Stafford R, Seliger SL; LIFE Study Group. Impact of moderate physical activity on the longitudinal trajectory of a cardiac specific biomarker of injury: Results from a randomized pilot study of exercise intervention. *Am Heart J*. 2016 Sep;179:151-6. doi: 10.1016/j.ahj.2016.07.001. Epub 2016 Jul 12.
37. Dotson V, Hsu FC, Langae TY, McDonough CW, King AC, Cohen RA, Newman AB, Kritchevsky SB, Myers V, Manini TM, Pahor M, For the LIFE Study Group. (2016). Genetic Moderators of the Impact of Physical Activity on Depressive Symptoms. *Journal of Frailty & Aging*. Volume 5 (1), 6-14.
38. Gill TM, Guralnik JM, Pahor M, Church T, Fielding RA, King AC, Marsh AP, Newman AB, Pellegrini CA, Chen SH, Allore HG, Miller ME; LIFE Study Investigators.; LIFE Study Investigators. Effect of

- Structured Physical Activity on Overall Burden and Transitions between States of Major Mobility Disability in Older Persons: Secondary Analysis of a Randomized Controlled Trial. *Ann Intern Med.* 2016 Dec 20;165(12):833-840. PMID: PMC5476905.
39. Gill TM, Pahor M, Guralnik JM, McDermott MM, King AC, Buford TW, Strotmeyer ES, Nelson ME, Sink KM, Demons JL, Kashaf SS, Walkup MP, Miller ME; LIFE Study Investigators. Effect of structured physical activity on prevention of serious fall injuries in adults aged 70-89: randomized clinical trial (LIFE Study). *BMJ* 2016;352:i245.
  40. Groessl EJ, Kaplan RM, Castro Sweet CM, Church T, Espeland MA, Gill TM, Glynn NW, King AC, Kritchevsky S, Manini T, McDermott MM, Reid KF, Rushing J, Pahor M; LIFE Study Group. Cost-effectiveness of the LIFE Physical Activity Intervention for Older Adults at Increased Risk for Mobility Disability. *J Gerontol A Biol Sci Med Sci.* 2016 May;71(5):656-62. doi: 10.1093/gerona/glw001. Epub 2016 Feb 17.
  41. Henderson RM, Lovato L, Miller ME, Fielding RA, Church TS, Newman AB, Buford TW, Pahor M, McDermott MM, Stafford RS, Lee DS, Kritchevsky SB; LIFE Study Investigators. Effect of Statin Use on Mobility Disability and its Prevention in At-risk Older Adults: The LIFE Study. *J Gerontol A Biol Sci Med Sci.* 2016 Nov;71(11):1519-1524. PMID: PMC5055646.
  42. Kheirkhan M, Tudor-Locke C, Axtell R, Buman MP, Fielding RA, Glynn NW, Guralnik JM, King AC, White DK, Miller ME, Siddique J, Brubaker P, Rejeski WJ, Ranshous S, Pahor M, Ranka S, Manini TM.. Actigraphy features for predicting mobility disability in older adults. *Physiol Meas.* 2016 Sep 21;37(10):1813-1833.
  43. Marsh AP, Applegate WB, Guralnik JM, Jack Rejeski W, Church TS, Fielding RA, Gill TM, King AC, Kritchevsky SB, Manini TM, McDermott MM, Newman AB, Stowe CL, Walkup MP, Pahor M, Miller ME; LIFE Study Investigators. Hospitalizations During a Physical Activity Intervention in Older Adults at Risk of Mobility Disability: Analyses from the Lifestyle Interventions and Independence for Elders Randomized Clinical Trial. *J Am Geriatr Soc.* 2016 May;64(5):933-43. doi: 10.1111/jgs.14114.
  44. O'Hartaigh B, Buford T, Buman M, Demons J, Dodson J, Forman D, Gill T, Lovato L, McDermott M, Pahor M. Effect of a Long-Term Physical Activity Intervention on Resting Pulse Rate in Older Persons: Results from the Lifestyle Interventions and Independence for Elders Study. *J Am Geriatr Soc.* 2016 Dec;64(12):2511-2516. PMID: PMC5173403
  45. Newman A, Buford T, Church T, Dodson J, Fielding R, Krtichevsky S, McDermott M, Pahor M, Stafford R. Cardiovascular events in a physical activity intervention as compared to a successful aging intervention: The LIFE Study randomized trial. *JAMA Cardiology.* 2016 Aug 1;1(5):568-74
  46. Reid K, Fielding R, Anton S, Axtell R, Katula J, Kerwin D, King A, Kramer A, Miller M, Myers V, Rejeski W, Buford TW, Miller ME, Church TS, Gill TM, Henderson R, Hsu FC, McDermott MM, Nadkarni N, Pahor M, Stafford RS, Carter CS; LIFE Study Research Group. Antihypertensive Use and the Effect of a Physical Activity Intervention in the Prevention of Major Mobility Disability Among Older Adults: The LIFE Study. *J Gerontol A Biol Sci Med Sci.* 2016 Jul;71(7):974-81. doi: 10.1093/gerona/glv222. Epub 2016 Feb 10.
  47. Rejeski WJ, Marsh AP, Brubaker PH, Buman M, Fielding RA, Hire D, Manini T, Rego A, Miller ME; LIFE Study Investigators. Analysis and Interpretation of Accelerometry Data in Older Adults: The LIFE Study. *J Gerontol A Biol Sci Med Sci.* 2016 Apr;71(4):521-8. doi: 10.1093/gerona/glv204. Epub 2015 Oct 29.
  48. Rosano C, Sink K, Studenski S, Verghese J, Walkup M, Williamson J. Cognitive performance does not limit physical activity participation in the Lifestyle Interventions and Independence for Elders pilot study (LIFE-P). *J Prev Alzheimers Dis.* 2017;4(1):44-50.Santanasto A, Newman A, Glynn N, Goodpaster B, Strotmeyer E, Conley K, Boudreau R, Coen P, Jubrias S. The relationship between mitochondrial function and mobility in older adults with a wide range of function. *Exp Gerontol.* 2016 Aug;81:1-7.
  49. Vaz Fragoso CA, Beavers DP, Anton SD, Liu CK, McDermott MM, Newman AB, Pahor M, Stafford RS, Gill TM; Lifestyle Interventions and Independence in Elders Investigators. Effect of Structured Physical Activity on Respiratory Outcomes in Sedentary Elderly Adults with Mobility Limitations. *J Am Geriatr Soc.* 2016 Mar;64(3):501-9. doi: 10.1111/jgs.14013. PMID: PMC4806401

**2015**

50. Bann D, Ambrosius W, Botosaneanu A, Church T, Fiedling R, Gill T, Glynn N, Hire D, King A, Manini T, McDermott M, Pahor M. Physical activity and sedentary behavior in relation to grip strength and body mass index: cross-sectional findings from the Lifestyle Interventions and Independence for Elders (LIFE) study. *PLOS One* 2015; 10(2): e0116058. PMID: PMC4315494
51. Bondoc I, Cochran S, Church T, Dahinden P, Hettwer S, Hsu F, Pahor M, Stafford R, Buford T. Effects of a one-year physical activity program on serum C-terminal Agrin Fragment (CAF) concentrations among mobility-limited older adults. *J Nutr Health Aging*. 2015;19(9):922-7. PMID: PMC4682669.
52. Botosaneanu A, Ambrosius W, Anton S, Church T, de Rekeneire N, Folta S, Gill T, Goodpaster B, King A, Nicklas B, Spring B. Prevalence of metabolic syndrome and its association with physical performance, disability and subjective well-being among LIFE Study participants. *Jour Am Geriatr Soc*. 2015 Feb;63(2):222-32. PMID: PMC4333053
53. Espeland MA, Newman AB, Sink K, Gill TM, King AC, Miller ME, Guralnik J, Katula J, Church T, Manini T, Reid KF, McDermott MM; LIFE Study Group. Associations Between Ankle-Brachial Index and Cognitive Function: Results From the Lifestyle Interventions and Independence for Elders Trial. *J Am Med Dir Assoc*. 2015 Aug 1;16(8):682-9. doi: 10.1016/j.jamda.2015.03.010. Epub 2015 Apr 11.
54. Fitzgerald J, Johnson L, Hire D, Buford T, Ambrosius W, Anton S, Dodson J, Manini T, Marsh A, McDermott M, Nocera J, Pahor M, Tudor-Locke C, White D, Yank V, For the LIFE Study Research Group. Association of Objectively-measured Physical Activity with Cardiovascular Risk in Mobility-limited Older Adults. *J Am Heart Assoc*. 2015 Feb; 4(2): e001288. PMID: PMC4345863
55. King AC, Salvo D, Banda JA, Ahn DK, Gill TM, Miller M, Newman AB, Fielding RA, Siordia C, Moore S, Folta S, Spring B, Manini T, Pahor M; LIFE Study Investigators. An observational study identifying obese subgroups among older adults at increased risk of mobility disability: do perceptions of the neighborhood environment matter? *Int J Behav Nutr Phys Act*. 2015 Dec 18;12:157. doi: 10.1186/s12966-015-0322-1.
56. Mankowski R, Aubertin-Leheudre M, Beavers D, Botosaneanu A, Buford T, Church T, Glynn N, King A, Liu C, Manini T, Marsh A, McDermott M, Nocera J, Pahor M, Strotmeyer E, Anton S, The LIFE Research Group. Sedentary time is associated with the metabolic syndrome in older adults with mobility limitations — The LIFE Study. *Experimental Gerontology*. 2015 Oct; 70: 32-36. PMID: PMC4600654
57. Rejeski J, Fielding R, Gill T, Guralnik J, Ip E, King A, Manini T, Marsh A, McDermott M, Newman A, Rushing J, Tudor-Locke C. The MAT-sf: Identifying Risk for Major Mobility Disability. *J Gerontol A Biol Sci Med Sci* (2015) 70 (5): 641-646. PMID: PMC4447779
58. Sink KM, Espeland MA, Castro CM, Church T, Cohen R, Dodson JA, Guralnik J, Hendrie HC, Jennings J, Katula J, Lopez OL, McDermott MM, Pahor M, Reid KF, Rushing J, Verghese J, Rapp S, Williamson JD; LIFE Study Investigators. Effect of a 24-Month Physical Activity Intervention vs Health Education on Cognitive Outcomes in Sedentary Older Adults: The LIFE Randomized Trial. *JAMA*. 2015 Aug 25;314(8):781-90.
59. Vaz Fragoso C, Miller M, King A, Krtichevsky S, Liu C, Myers V, Nadkarni N, Pahor M, Spring B, Gill T, LIFE Study Group. Effect of Structured Physical Activity on Sleep-Wake Behaviors in Sedentary Elderly Adults with Mobility Limitations. *J Am Geriatr Soc*. 2015 Jul;63(7):1381-90. PMID: PMC4892176.

**2014**

60. Beavers KM, Hsu FC, Serra MC, Yank V, Pahor M, Nicklas BJ. The Effects of a Long-term Physical Activity Intervention on Serum Uric Acid in Older Adults at risk for Physical Disability. *J Aging Phys Act*. 2014 Jan; 22(1): 25-33. PMID: PMC4120269.
61. Buford T, Brinkley T, Carter C, Church T, Dodson J, Goodpaster B, Hsu F, Johnson J, McDermott M, Nicklas B, Pahor, M, Yank V. Genetic Influence on Exercise-Induced Changes in Physical Function

among Mobility-Limited Older Adults. *Physiol Genomics*. 2014 Mar 1;46(5):149-58. PMID: PMC3949106

62. Cesari M, Church T, King A, Manini T, Miller M, Newman A, Vellas B, Pahor M. Physical activity in the prevention and treatment of frailty in older persons: Results from the LIFE-P study. *J Gerontol A Biol Sci Med Sci*. 2015 Feb;70(2):216-22. PMID: PMC4311184
63. O'Hartaigh B, Pahor M, Buford TW, Dodson JA, Foreman DE, Gill TM, LIFE Study Group. Physical activity and resting pulse rate in older adults: Findings from a randomized controlled trial. *Am Heart J*. 2014 Oct;168(4):597-604. PMID: PMC4180058.
64. Pahor M, Guralnik JM, Ambrosius WT, Blair S, Bonds DE, Church TS, Espeland MA, Fielding RA, Gill TM, Groessl EJ, King AC, Kritchevsky SB, Manini TM, McDermott MM, Miller ME, Newman AB, Rejeski WJ, Sink KM, Williamson JD; LIFE study investigators. Effect of structured physical activity on prevention of major mobility disability in older adults: the LIFE study randomized clinical trial. *JAMA*. 2014 Jun 18;311(23):2387-96. PMID: PMC4266388
65. Sink KM, Espeland MA, Rushing J, Castro CM, Church TS, Cohen R, Gill TM, Henkin L, Jennings JM, Kerwin DR, Manini TM, Myers V, Pahor M, Reid KF, Woolard N, Rapp SR, Williamson JD; LIFE Investigators. The LIFE Cognition Study: design and baseline characteristics. *Clin Interv Aging*. 2014 Aug 27;9:1425-36. PMID: PMC4154884
66. Vaz Fragoso C, Beavers D, Berra K, Gill T, Kritchevsky S, Liu C, Manini T, McDermott M, Newman A, Rejeski J. Respiratory impairment and dyspnea among sedentary older persons with functional limitations. *J Am Geriatr Soc*. 2014 Apr;62(4):622-8. PMID: PMC3989438
67. Vaz Fragoso C, Brinkley T, Church T, Hsu F, Liu C, Manini T, McDermott M, Newman A, Stafford R. Combined Reduced Forced Expiratory Volume in 1 Second (FEV1) and Peripheral Artery Disease in Sedentary Elders With Functional Limitations. *J Am Med Dir Assoc*. 2014 Sep;15(9):665-70. PMID: PMC4145029
68. Vaz Fragoso CA, Miller ME, Fielding RA, King AC, Kritchevsky SB, McDermott MM, Myers V, Newman AB, Pahor M, Gill TM. Sleep-Wake Disturbances in Sedentary Community-Dwelling Elderly Adults with Functional Limitations. *J Am Geriatr Soc*. 2014 Jun;62(6):1064-72. PMID: PMC4057978

## 2013

69. Espeland M, Katula J, Rushing J, Kramer A, Jennings J, Sink K, Nadkarni N, Reid K, Castro C, Church T, Kerwin D, Williamson J, Marottoli R, Rushing S, Marsiske M, Rapp S, LIFE Study Group. Performance of a computer-based assessment of cognitive function measures in two cohorts of seniors. *Int J Geriatr Psychiatry*. 2013 Dec;28(12):1239-50. PMID: PMC3775886
70. Ip EH, Church T, Marshall SA, Zhang Q, Marsh AP, Guralnik J, King AC, Rejeski WJ. Physical activity increases gains in and prevents loss of physical function: Results from the Lifestyle Interventions and Independence for Elders Pilot Study. *J Gerontol A Biol Sci Med Sci* 2013 Apr; 68(4):426-32. PMID: PMC3593616
71. Marsh A, Lovato L, Glynn N, Kennedy K, Castro C, Domanchuk K, McDavitt E, Rodarte R, Marsiske M, McGloin J, Groessl E, Pahor M, Guralnik J. Lifestyle Interventions and Independence for Elders Study: Recruitment and baseline characteristics. *J Gerontol A Biol Sci Med Sci* 2013 Dec; 68(12): 1549-58. PMID: PMC3814232
72. McDermott MM, Applegate WB, Bonds DE, Buford TW, Church T, Espeland MA, Gill TM, Guralnik JM, Haskell W, Lovato LC, Pahor M, Pepine CJ, Ried KF, Newman A. Normal Ankle Brachial Index Values are Less Prevalent than Abnormal Values and are Associated with Better Lower Extremity Functional Performance among Community-Dwelling Older Men and Women in the Lifestyle Interventions and Independence for Elders (LIFE Study). *J American Heart Association* 2013 Nov 12; 2(6): e000257. PMID: PMC3886743
73. Rejeski WJ, Axtell R, Fielding R, Katula J, King A, Manini T, Marsh A, Miller M, Newman M, Pahor M, Rego A, Tudor-Locke C, Walkup M. Promoting Physical Activity for Elders with Compromised Function: The LIFE Study. *Clinical Interventions in Aging*; 2013:8 Sept; 1119-1131. PMID: PMC3775623

74. Rejeski WJ, Marsh AP, Anton S, Chen SH, Church T, Gill TM, Guralnik JM, Glynn NW, King AC, Rushing J, Ip EH, and LIFE Research Group. The MAT-sf: Clinical relevance and validity. *J Gerontol A Biol Sci Med Sci*. 2013 Dec;68(12):1567-74. PMID: PMC3814234

## 2012

75. Brinkley TE, Hsu FC, Beavers KM, Church TS, Goodpaster BH, Stafford RS, Pahor M, Kritchevsky SB, Nicklas BJ. Total and Abdominal Adiposity Are Associated With Inflammation in Older Adults Using a Factor Analysis Approach. *J Gerontol A Biol Sci Med Sci*. 2012 Oct;67(10):1099-106. PMID: PMC3437966

76. Buford TW, Manini TM, Hsu FC, Cesari M, Anton SD, Nayfield S, Stafford RS, Church TS, Pahor M, Carter CS. Angiotensin-Converting Enzyme Inhibitor Use by Older Adults Is Associated with Greater Functional Responses to Exercise. *Journal of the American Geriatrics Society*. 2012 July; 60(7): 1244-1252. PMID: PMC3625953

77. Heffernan KS, Manini TM, Hsu F, Blair SN, Nicklas BJ, Kritchevsky SB, Newman AB, Sutton-Tyrrell K, Church TS, Haskell WL, Fielding RA. Relation of pulse pressure to long-distance gait speed in community-dwelling older adults: findings from the LIFE-P Study. *PLoS One*. 2012; 7(11): e49544. Published online 2012 November 21.

78. Wang X, Hsu FC, Isom S, Walkup MP, Kritchevsky SB, Goodpaster BH, Church TS, Pahor M, Stafford RS, and Nicklas BJ. Effects of a 12-Month Physical Activity Intervention on Prevalence of Metabolic Syndrome in Elderly Men and Women *J Gerontol A Biol Sci Med Sci*. 2012;67A(4):417-424.

## 2011

79. Fielding RA, Rejeski WJ, Blair S, Church T, Espeland MA, Gill TM, Guralnik JM, Hsu FC, Katula J, King AC, Kritchevsky SB, McDermott MM, Miller ME, Nayfield S, Newman AB, Williamson JD, Bonds D, Romashkan S, Hadley E, and Pahor M. The Lifestyle Interventions and Independence for Elders Study: Design and Methods. *J Gerontol A Biol Sci Med Sci*. 2011 November; 66A(11): 1226–1237.

80. Houston DK, Tooze JA, Hausman DB, Johnson MA, Micklas BJ, Miller ME, Neiberg RH, Marsh AP, Newman AB, Blair SN, Kritchevsky SB. Change in 25-hydroxyvitamin D and physical performance in older adults. *J Gerontol A Biol Sci Med Sci*. 2011 April; 66(A):430-436.

81. Katula JA, Kritchevsky SB, Guralnik JM, Glynn NW, Pruitt L, Wallace K, Walkup MP, Hsu FC, Studenski SA, Gill TM, Groessl EJ, Wallace JM, Pahor M. Lifestyle Interventions and Independence for Elders Pilot Study (LIFE-P): Recruitment and Baseline Characteristics. *J Am Geriatr Soc*. 2007 May;55(5):674-83.

82. Marsh AP, Rejeski WJ, Espeland MA, Miller ME, Church TS, Fielding RA, Gill TM, Guralnik JM, Newman AB, and Pahor M. Muscle Strength and BMI as Predictors of Major Mobility Disability in the Lifestyle Interventions and Independence for Elders Pilot. *J Gerontol A Biol Sci Med Sci*. 2011 December; 66A(12): 1376–1383.

83. Matthews MM, Hsu F, Walkup MP, Barry LC, Patel KV, and Blair SN. Depressive symptoms and physical activity in the LIFE Pilot Study. *J Am Geriatr Soc*. 2011 Mar; 59(3):495-500.

## 2010

84. Beavers KM, Hsu FC, Isom S, Kritchevsky SB, Church T, Goodpaster B, Pahor M, Nicklas BJ.. Long-term physical activity and inflammatory biomarkers in older adults. *Med Sci Sports Exerc*. 2010 Dec;42(12):2189-96.

85. Chale-Rush A, Guralnik JM, Walkup MP, et al. Relationship between physical functioning and physical activity in the lifestyle interventions and independence for elders pilot. *J Am Geriatr Soc*. 2010 October; 58(10):1918–24.

86. Hsu FC, Rejeski WJ, Ip EH, Katula JA, Fielding RA, Jette AM, Studenski SA, Blair SN, and Miller ME. Evaluation of the Late Life Disability Instrument in the LIFE Pilot Study. *Health Qual Life Outcomes*. 2010; 8: 115.



87. Manini TM, Newman AB, Fielding RA, Blair SN, Perri MG, Anton SD, Goodpaster BC, Katula J, Rejeski J, King AC, Kritchevsky SB, Hsu FC, Pahor M and LIFE Research Group. Effects of exercise on mobility in obese and non obese older adults. *Obesity*. 2010 June; 18(6), pp.1168–1175.
88. Phillips EM, Katula J, Miller ME, Walkup MP, Brach JS, King AC, Rejeski WJ, Church TS, and Fielding RA. Interruption of physical activity because of illness in the LIFE-P Trial. *J Aging Phys Act* 2010 Jan;18(1):61-74.
89. Rosano C, Venkatraman VK, Guralnik J, Newman AB, Glynn NW, Launer L, Taylor CA, Williamson J, Studenski S, Pahor M, Aizenstein H: Psychomotor Speed and Functional Brain MRI 2 Years After Completing a Physical Activity Treatment. *J Gerontol A Biol Sci Med Sci*. 2010 June, 65A(6):639–647.

## 2009

90. Groessl EJ, Kaplan RM, Blair SB, Rejeski WJ, Katula JA, King AC, Fielding RA, Glynn NW, and Pahor M. A cost analysis of a physical activity intervention for older adults. *J Phys Act Health*. 2009 November; 6(6): 767–774.
91. Kwon S, Perara S, Pahor M, Katula JA, King AC, Groessl, EJ, and Studenski SA. What is a meaningful change in physical performance? Findings from a clinical trial in older adults (the LIFE-P Study). *J Nutr Health Aging*. 2009 Jun;13(6):538-44.
92. Rejeski WJ, Marsh AP, Chmelo E, Prescott AJ, Dobrosielski M, Walkup MP, Espeland MA, Miller ME, and Kritchevsky SB. The Lifestyle Interventions and Independence for Elders Pilot (LIFE-P): 2-year follow-up. *J Gerontol A Biol Sci Med Sci*. 2009 April; 64A(4):462–467.
93. Vestergaard S, Patel KV, Walkup MP, Pahor M, Marsh AP, Espeland MA, Studenski S, Gill TM, Church T, Guralnik JM. Stopping to rest during a 400-meter walk and incident mobility disability in older persons with functional limitations. *J Am Geriatr Soc*. 2009 February;57(2):260-265.

## 2008

94. Church TS, Gill TM, Newman AB, Blair SN, Earnest CP, and Pahor M. Maximal Fitness Testing in Sedentary Elderly at Substantial Risk of Disability: the LIFE-P Trial Exp. *J Aging Phys Act*. 2008 Oct;16(4):408-15.
95. Goodpaster BH, Chomentowski P, Ward BK, Rossi A, Glynn NW, Delmonico MJ, Kritchevsky SB, Pahor M, and Newman AB. Effects of exercise on physical strength and skeletal muscle fat infiltration in older adults: a randomized controlled trial. *J Appl Physiol*. 2008 Nov;105(5):1498-1503.
96. Nicklas BJ, Hsu FC, Brinkley TJ, Church TS, Goodpaster BH, Kritchevsky SB, and Pahor M. Exercise training and plasma C-reactive protein and interleukin-6 in elderly people. *J. Am. Geriatr. Soc*. 2008 November;56(11), 2045–2052.
97. Picarsic JL, Glynn NW, Taylor CA, Katula JA, Goldman SE, Studenski SA, Newman AB. Self-reported napping and duration of sleep in the Lifestyle Interventions and Independence for Elders Pilot Study. *J Am Geriatr Soc*. 2008 Sep;56(9):1753-5.
98. Pruitt LA, Glynn NW, King AC, Guralnik JM, Aiken EK, Miller G, and Haskell WL. Use of accelerometry to measure physical activity in older adults at risk for mobility disability. *J Aging Phys Act*. 2008 Oct;16(4):416-34.
99. Rejeski WJ, King AC, Katula JA, Kritchevsky SB, Miller ME, Walkup MP, Glynn NW, Pahor M. Physical activity in prefrail older adults: Confidence and satisfaction related to physical function. *Journals of Gerontology Series B: Psychological Sciences and Social Sciences*. 2008;63,19–26

## 2007

100. Espeland MA, Gill TM, Guralnik J, Miller ME, Fielding RA, Newman AB, Pahor M and for the Lifestyle Interventions and Independence for Elders Study Group. Designing Clinical Trials for Mobility Disability: Results from the Lifestyle Interventions and Independence for Elders Pilot (LIFE-P) Trial. *J Gerontol A Biol Sci Med Sci*. 2007 Nov;62(11):1237-1243.
101. Fielding RA, Katula J, Miller ME, Abbott-Pillola K, Jordan A, Glynn NW, Goodpaster B, Walkup MP, King AC, Rejeski WJ. Activity adherence and Physical function in older adults with functional limitations. *Med Sci Sports Exerc*. 2007 Nov;39(11):1997-2004.

102. Groessl EJ, Kaplan RM, Rejeski WJ, Katula JA, King AC, Frierson G, Glynn NW, Hsu F, Walkup M, Pahor M. Health-related quality of life in older adults at risk for disability. *Am J Prev Med.* 2007 September;33(3):214-218.
103. Rejeski WJ, Miller ME, King AC, Studenski SA, Katula JA, Fielding RA, Glynn NW, Walkup MP, Ashmore JA. Predictors of adherence to physical activity in the Lifestyle Interventions and Independence for Elders pilot study (LIFE-P). *Clin Interv Aging.* 2007 September;2(3):485-494.

**2006**

104. Pahor M, Blair SN, Espeland M, Fielding R, Gill TM, Guralnik JM, Hadley EC, King AC, Kritchevsky SB, Maraldi C, Miller ME, Newman AB, Rejeski WJ, Romashkan S, Studenski S. Effects of physical activity intervention on lower extremity physical performance and on risk of major mobility disability: results from the LIFE Pilot Study. *J Gerontol A Biol Sci Med Sci.* 2006 Nov;61(11):1157-65. Erratum in: *J Gerontol A Biol Sci Med Sci.* 2007 Mar;62(3):337.

**2005**

105. Rejeski WJ, Fielding RA, Blair SN, Guralnik JM, Gill TM, Hadley EC, King AC, Kritchevsky SB, Miller ME, Newman AB, Pahor M. The lifestyle interventions and independence for elders (LIFE) pilot study: design and methods. *Contemp Clin Trials.* 2005; 26: 141-154.

| <b>Supplemental Table S2: Independently funded grants that took advantage of the LIFE studies</b> |                                                                                                                                                                               |                                                               |                                              |
|---------------------------------------------------------------------------------------------------|-------------------------------------------------------------------------------------------------------------------------------------------------------------------------------|---------------------------------------------------------------|----------------------------------------------|
|                                                                                                   | <b>Title of Grant</b>                                                                                                                                                         | <b>Principal Investigator</b>                                 | <b>Funding Agency / Grant Number</b>         |
| 1                                                                                                 | Effect of Exercise Modality During Weight Loss on Bone Health in Older Adults                                                                                                 | Kristen Beavers, PhD                                          | NIA K01AG047921                              |
| 2                                                                                                 | Sarcopenia & Physical Frailty in Older People: Multi-Component Treatment Strategies (SPRINTT)                                                                                 | Roberto Bernabei, MD (Marco Pahor, MD; Emanuele Marzetti, MD) | EU Innovative Medicines Initiative           |
| 3                                                                                                 | Whole Genome Association Analysis of the Diabetes Heart Study (LIFE Ancillary: Analysis of Coding Variants Associated with Age-Related Phenotypes)                            | Donald Bowden, PhD                                            | NHLBI R01HL092301                            |
| 4                                                                                                 | Effects of a one-year physical activity program (LIFE-P) on serum C-terminal Agrin Fragment (CAF) concentrations among older adults at risk for physical disability           | Thomas Buford, PhD                                            | NeurotuneAG (Switzerland)                    |
| 5                                                                                                 | Identifying Frailty in Primary Care: Implementation of an Electronic Medical Record-Based Frailty Index                                                                       | Kathryn Callahan, MD                                          | NIA K76AG059986                              |
| 6                                                                                                 | Oxidative damage, inflammation and physical exercise                                                                                                                          | Matteo Cesari, MD, PhD                                        | NIA R01AG026556                              |
| 7                                                                                                 | Impact of moderate physical activity on the longitudinal trajectory of cardiac specific biomarkers of stress and injury: support for modifying early heart failure phenotypes | Christopher deFilippi, MD; Stephen Seliger, MD                | Roche Diagnostics Corporation                |
| 8                                                                                                 | Geriatric Impairments, Risk of Treatment-Related Harms, and Shared Decision-Making Among Older Adults with Acute Myocardial Infarction                                        | John Dodson, MD                                               | NIA K23AG052463                              |
| 9                                                                                                 | Physical Activity and Depressive Symptoms in LIFE-P: Effects of Genetic Polymorphisms and Symptom Dimensions of Depression                                                    | Vonetta Dotson, PhD                                           | Diversity Supplement to NIA U01AG022376-07S1 |
| 10                                                                                                | The Effects of Exercise on Apelin                                                                                                                                             | Cedric Dray, PhD                                              | INSERM (France)                              |
| 11                                                                                                | Boston Claude D. Pepper Older Americans Independence Center                                                                                                                   | Roger Fielding, PhD                                           | NIA P30AG031679                              |
| 12                                                                                                | Nutrition, Sarcopenia, Physical Activity, and Skeletal Muscle Function in the Elderly                                                                                         | Roger Fielding, PhD                                           | USDA 58-1950-0-014                           |
| 13                                                                                                | Nitrite Benefits to Mediate Fatigability in Older HFPEF Patients                                                                                                              | Daniel Forman, MD (Nancy Glynn, PhD)                          | NIA R56AG051637                              |
| 14                                                                                                | Cardiovascular Disease Prevention Training Program (LIFE Ancillary: Exercise, brain-derived neurotrophic factor (BDNF) and cognitive decline)                                 | Stephen Fortmann, MD (Natara Garovoy, PhD)                    | NHLBI T32HL007034-29                         |
| 15                                                                                                | Academic Leadership Award in Disability and Disabling Disorders                                                                                                               | Thomas Gill, MD                                               | NIA K07AG043587                              |
| 16                                                                                                | Testosterone level, SPPB scores, ad symptoms among older men with functional limitations                                                                                      | Thomas Gill, MD                                               | NIA U01AG027016                              |
| 17                                                                                                | Yale University Claude D. Pepper Older Americans Independence Center                                                                                                          | Thomas Gill, MD                                               | NIA P30AG021342                              |
| 18                                                                                                | Randomized Trial of Multifactorial Fall Injury Prevention Strategy (STRIDE)                                                                                                   | Thomas Gill, MD; Shalender Bhasin, MD; David Reuben, MD       | PCORI/NIA U01AG048270                        |
| 19                                                                                                | Predictors and Long-term Health Outcomes Associated with Cognitive and Physical Decline in Older Adults                                                                       | Elizabeth Handing, PhD                                        | NIA F32AG058457                              |

|    |                                                                                                                                                                      |                                                                                |                            |
|----|----------------------------------------------------------------------------------------------------------------------------------------------------------------------|--------------------------------------------------------------------------------|----------------------------|
| 20 | Trial of vitamin d supplementation and neuromuscular function in older adults                                                                                        | Denise Houston, PhD                                                            | NIA Denise Houston, PhD    |
| 21 | Vitamin D Status, Related Gene Polymorphisms, and Physical Function in Elders                                                                                        | Denise Houston, PhD                                                            | NIA K01AG030506            |
| 22 | Improving Outcome Measurement for Medical Rehabilitation Clinical Trials                                                                                             | Alan Jette, PhD (Roger Fielding, PhD)                                          | NICHHD R24HD065688         |
| 23 | Wake Forest University Claude D. Pepper Older Americans Independence Center                                                                                          | Stephen Kritchevsky, PhD                                                       | NIA P30AG021332            |
| 24 | Multimodal imaging of brain activity to investigate walking and mobility decline in older adults                                                                     | Todd Manini, PhD                                                               | NIA U01 AG061389           |
| 25 | Metabolic cost of daily activities in older adults                                                                                                                   | Todd Manini, PhD                                                               | NIA R01AG042525            |
| 26 | Wearable technology infrastructure to enhance capacity for Real-time, Online Assessment and Mobility Monitoring (ROAMM) of intervening health events in older adults | Todd Manini, PhD                                                               | NIA R21/R33 AG059207       |
| 27 | PEAKS Validation of mobile technologies for clinical assessment, monitoring & intervention.                                                                          | Todd Manini, PhD                                                               | NCI SBIR HHSN261201500014C |
| 28 | Task Specific Exercise for the Clinically Disabled                                                                                                                   | Todd Manini, PhD                                                               |                            |
| 29 | mtDNA Variant Modifiers of Cardiopulmonary Responsiveness to Physical Activity                                                                                       | Todd Manini, PhD (Carlos Vaz Fragoso, MD)                                      | NHLBI R01HL121023          |
| 30 | Exercise Training and Inflammatory Risk Factors for Disability                                                                                                       | Barbara Nicklas, PhD                                                           | NIA R01AG027529            |
| 31 | University of Florida Claude D. Pepper Older Americans Independence Center                                                                                           | Marco Pahor, MD                                                                | NIA P30AG028740            |
| 32 | Enabling Reduction of Low-Grade Inflammation in Seniors (ENRGISE)                                                                                                    | Marco Pahor, MD; Walter Ambrosius, PhD                                         | NIA U01AG050499            |
| 33 | Molecular Transducers of Physical Activity Consortium (MoTrPAC)                                                                                                      | Marco Pahor, MD; Michael Miller, PhD; W. Jack Rejeski, PhD; Russell Tracy, PhD | NIAMS U24AR071113          |
| 34 | Ultra-High-Field Neuroimaging in Elderly After a Two-Year Exercise Intervention                                                                                      | Caterina Rosano, PhD                                                           | NIA R01AG044474            |
| 35 | Training in Molecular Epidemiology: Linking Genes to Physical Function in Older Adults                                                                               | Adam Santanasto, PhD                                                           | NIA K01AG057726            |
| 36 | Pathways of Beneficial Effects of a Physical Activity Intervention on Hippocampal Atrophy Among Older Adults                                                         | C. Elizabeth Shaaban, PhD                                                      | NIA F31AG054084            |
| 37 | University of Pittsburgh Claude D. Pepper Older Americans Independence Center                                                                                        | Stephanie Studenski, MD (Anne Newman, MD; Caterina Rosano, MD)                 | NIA P30AG024827            |
| 38 | The Aging and Cognitive Health Evaluation in Elders (ACHIEVE) Study                                                                                                  | Frank Lin, MD (Nancy W. Glynn, PhD)                                            | NIA R01AG055426            |

**Supplemental Table S3. LIFE and LIFE-P Early Career Scientists**

|    | <b>Investigator</b>       | <b>Site</b>                           |
|----|---------------------------|---------------------------------------|
| 1  | Stephen Anton, PhD        | University of Florida                 |
| 2  | Anoop Balachandran, PhD   | University of Florida                 |
| 3  | David Bann, PhD           | Yale University                       |
| 4  | Daniel Beavers, PhD       | Wake Forest University                |
| 5  | Kristin Beavers, PhD      | Wake Forest University                |
| 6  | Anda Botosaneanu, MD, PhD | Yale University                       |
| 7  | Tina Brinkley, PhD        | Wake Forest University                |
| 8  | Thomas Buford, PhD        | University of Florida                 |
| 9  | Matthew Buman, PhD        | Stanford University                   |
| 10 | Kathryn Callahan, MD      | Wake Forest University                |
| 11 | Christy Carter, PhD       | University of Florida                 |
| 12 | Cynthia Castro, PhD       | Stanford University                   |
| 13 | Matteo Cesari, PhD        | University of Florida                 |
| 14 | Duane Corbett, PhD        | University of Florida                 |
| 15 | Yenisel Cruz-Almeida, PhD | University of Florida                 |
| 16 | Carlo Custodero, MD       | University of Florida                 |
| 17 | Rupak Datta, MD, PhD      | Yale University                       |
| 18 | John Dodson, MD           | Yale University                       |
| 19 | Vonetta Dotson, PhD       | University of Florida                 |
| 20 | Sara Folta, PhD           | Tufts University                      |
| 21 | Nancy Glynn, PhD          | University of Pittsburgh              |
| 22 | Bret Goodpaster, PhD      | University of Pittsburgh              |
| 23 | Erik Groessl, PhD         | University of California, San Diego   |
| 24 | Ally Hadjuk, PhD          | Yale University                       |
| 25 | Elizabeth Handing, MD     | Wake Forest University                |
| 26 | Rebecca Henderson, MD     | Wake Forest University                |
| 27 | Denise Houston, PhD, RD   | Wake Forest University                |
| 28 | Fang-Chi Hsu, PhD         | Wake Forest University                |
| 29 | Neil Johannsen, PhD       | Pennington Biomedical Research Center |
| 30 | Susan Kashaf, MD          | Yale University                       |
| 31 | Diana Kerwin, MD          | Northwestern University               |
| 32 | Soo Kwon, PhD             | University of Florida                 |
| 33 | Brittney Lange-Maia, PhD  | University of Pittsburgh              |
| 34 | David Lee, PharmD, PhD    | Yale University                       |
| 35 | Kasia Lipska, MD          | Yale University                       |
| 36 | Christine Liu, MD         | Tufts University                      |
| 37 | Zuyun Liu, PhD            | Yale University                       |
| 38 | Todd Manini, PhD          | University of Florida                 |
| 39 | Robert Mankowski, PhD     | University of Florida                 |
| 40 | Cinzia Maraldi, MD        | University of Florida                 |
| 41 | Emanuele Marzetti, PhD    | University of Florida                 |
| 42 | Valerie Myers, PhD        | Pennington Biomedical Research Center |
| 43 | Neelesh Nadkarni, MD      | University of Pittsburgh              |
| 44 | Mark Newman, PhD          | University of Pittsburgh              |
| 45 | Robert Newton, PhD        | Pennington Biomedical Research Center |

|    |                           |                          |
|----|---------------------------|--------------------------|
| 46 | Joe Nocera, PhD           | University of Florida    |
| 47 | Brian O'Hartaigh, PhD     | Yale University          |
| 48 | Kieran Reid, PhD          | Tufts University         |
| 49 | Adam Santanasto, PhD      | University of Pittsburgh |
| 50 | C. Elizabeth Shaaban, PhD | University of Pittsburgh |
| 51 | Kimberly Sibille, PhD     | University of Florida    |
| 52 | Kaycee Sink, MD           | Wake Forest University   |
| 53 | Carlos Siordia, PhD       | University of Pittsburgh |
| 54 | Randall Stafford, MD      | Stanford University      |
| 55 | Elsa Strotmeyer, PhD      | University of Pittsburgh |
| 56 | Vincenzo Valiani, MD      | University of Florida    |
| 57 | Carlos Vaz Fragoso, MD    | Yale University          |
| 58 | Amal Wanigatuna, PhD      | University of Florida    |
| 59 | Veronica Yank, MD         | Stanford University      |

## **Supplemental Online Appendix: Research Investigators for the LIFE Study**

The Lifestyle Interventions and Independence for Elders Study is funded by a National Institutes of Health/National Institute on Aging Cooperative Agreement #U01 AG22376 and a supplement from the National Heart, Lung and Blood Institute 3U01AG022376-05A2S, and sponsored in part by the Intramural Research Program, National Institute on Aging, NIH.

### **Administrative Coordinating Center, University of Florida, Gainesville, FL**

Marco Pahor, MD – Principal Investigator of the LIFE Study  
Jack M. Guralnik, MD, PhD – Co- Investigator of the LIFE Study (University of Maryland School of Medicine, Baltimore, MD)  
Stephen D. Anton, PhD  
Thomas W. Buford, PhD  
Christiaan Leeuwenburgh, PhD  
Susan G. Nayfield, MD, MSc  
Todd M. Manini, PhD  
Connie Caudle  
Lauren Crump, MPH  
Latonia Holmes  
Jocelyn Lee, PhD  
Ching-ju Lu, MPH

This research is partially supported by the University of Florida Claude D. Pepper Older Americans Independence Center (1 P30 AG028740).

### **Data Management, Analysis and Quality Control Center, Wake Forest University, Winston Salem, NC**

Michael E. Miller, Ph.D. – DMAQC Principal Investigator  
Mark A. Espeland, Ph.D. – DMAQC Co- Investigator  
Walter T. Ambrosius, PhD  
William Applegate, MD  
Daniel P. Beavers, PhD, MS  
Robert P. Byington, PhD, MPH, FAHA  
Delilah Cook, CCRP  
Curt D. Furberg, MD, PhD  
Lea N. Harvin, BS  
Leora Henkin, MPH, Med  
John Hepler, MA  
Fang-Chi Hsu, PhD  
Kathy Joyce  
Laura Lovato, MS  
Juan Pierce, AB  
Wesley Roberson, BSBA  
Julia Robertson, BS  
Julia Rushing, BSPH, MStat  
Scott Rushing, BS  
Cynthia L. Stowe, MPM  
Michael P. Walkup, MS  
Don Hire, BS

W. Jack Rejeski, PhD  
Jeffrey A. Katula, PhD, MA  
Peter H. Brubaker, PhD  
Shannon L. Mihalko, PhD  
Janine M. Jennings, PhD  
Shyh-Huei Chen, PhD  
June J. Pierce, AB  
Haiying Chen, PhD

**National Institutes of Health, Bethesda, MD**

Evan C. Hadley, MD (National Institute on Aging)  
Sergei Romashkan, MD, PhD (National Institute on Aging)  
Kushang V. Patel, PhD (National Institute on Aging)

**National Heart, Lung and Blood Institute, Bethesda, MD**

Denise Bonds, MD, MPH

**Field Centers**

**Northwestern University, Chicago, IL**

Mary M. McDermott, MD – Field Center Principal Investigator  
Bonnie Spring, PhD – Field Center Co-Investigator  
Joshua Hauser, MD – Field Center Co-Investigator  
Diana Kerwin, MD – Field Center Co-Investigator  
Kathryn Domanchuk, BS  
Rex Graff, MS  
Alvito Rego, MA

**Pennington Biomedical Research Center, Baton Rouge, LA**

Timothy S. Church, MD, PhD, MPH – Field Center Principal Investigator  
Steven N. Blair, PED (University of South Carolina)  
Valerie H. Myers, PhD  
Ron Monce, PA-C  
Nathan E. Britt, NP  
Melissa Nauta Harris, BS  
Ami Parks McGucken, MPA, BS  
Ruben Rodarte, MBA, MS, BS  
Heidi K. Millet, MPA, BS  
Catrine Tudor-Locke, PhD, FACSM  
Ben P. Butitta, BS  
Sheletta G. Donatto, MS, RD, LDN, CDE  
Shannon H. Cocreham, BS

**Stanford University, Palo Alto, CA**

Abby C. King, Ph.D. – Field Center Principal Investigator  
Cynthia M. Castro, PhD  
William L. Haskell, PhD  
Randall S. Stafford, MD, PhD  
Leslie A. Pruitt, PhD



Veronica Yank, MD

Kathy Berra, MSN, NP-C, FAAN

Carol Bell, NP

Rosita M. Thiessen

Kate P. Youngman, MA

Selene B. Virgen, BAS

Eric Maldonado, BA

Kristina N. Tarin, MS, CSCS

Heather Klaftenegger, BS

Carolyn A. Prosak, RD

Ines Campero, BA

Dulce M. Garcia, BS

José Soto, BA

Linda Chio, BA

David Hoskins, MS

**Tufts University, Boston, MA**

Roger A. Fielding, PhD – Field Center Principal Investigator

Miriam E. Nelson, PhD

Sara C. Folta, PhD

Edward M. Phillips, MD

Christine K. Liu, MD

Erica C. McDavitt, MS

Kieran F. Reid, PhD, MPH

Dylan R. Kirn, BS

Evan P. Pasha, BS

Won S. Kim, BS

Julie M. Krol, MS

Vince E. Beard, BS

Eleni X. Tsiroyannis, BS

Cynthia Hau, BS, MPH

Dr. Fielding's contribution is partially supported by the U.S. Department of Agriculture, under agreement No. 58-1950-0-014. Any opinions, findings, conclusion, or recommendations expressed in this publication are those of the author(s) and do not necessarily reflect the view of the U.S. Dept of Agriculture.

This research is also supported by the Boston Claude D. Pepper Older Americans Independence Center (1P30AG031679) and the Boston Rehabilitation Outcomes Center (1R24HD065688-01A1).

**University of Florida, Gainesville, FL**

Todd M. Manini, PhD – Field Center Principal Investigator

Marco Pahor, MD – Field Center Co- Investigator

Stephen D. Anton, PhD

Thomas W. Buford, PhD

Michael Marsiske, PhD

Susan G. Nayfield, MD, MSc

Bhanuprasad D. Sandesara, MD  
Mieniecica L. Black, MS  
William L. Burk, MS  
Brian M. Hoover, BS  
Jeffrey D. Knaggs, BS  
William C. Marena, MT, CCRC  
Irina Korytov, MD  
Stephanie D. Curtis, BS  
Megan S. Lorow, BS  
Chaitalee S. Goswami  
Melissa A. Lewis  
Michelle Kamen BS  
Jill N. Bitz  
Brian K. Stanton, BS  
Tamika T. Hicks, BS  
Charles W. Gay, DC  
Chonglun Xie, MD (Brooks Rehabilitation Clinical Research Center, Jacksonville, FL)  
Holly L. Morris, MSN, RN, CCRC (Brooks Rehabilitation Clinical Research Center, Jacksonville, FL)  
Floris F. Singletary, MS, CCC-SLP (Brooks Rehabilitation Clinical Research Center, Jacksonville, FL)  
Jackie Causer, BSH, RN (Brooks Rehabilitation Clinical Research Center, Jacksonville, FL)  
Susan Yonce, ARNP (Brooks Rehabilitation Clinical Research Center, Jacksonville, FL)  
Katie A. Radcliff, M.A. (Brooks Rehabilitation Clinical Research Center, Jacksonville, FL)  
Mallorey Picone Smith, B.S. (Brooks Rehabilitation Clinical Research Center, Jacksonville, FL)  
Jennifer S. Scott, B.S. (Brooks Rehabilitation Clinical Research Center, Jacksonville, FL)  
Melissa M. Rodriguez B.S. (Brooks Rehabilitation Clinical Research Center, Jacksonville, FL)  
Margo S. Fitch, P.T. (Brooks Rehabilitation Clinical Research Center, Jacksonville, FL)  
Mendy C. Dunn, BSN (Assessment) (Brooks Rehabilitation Clinical Research Center, Jacksonville, FL)  
Jessica Q. Schlesinger, B.S. Brooks Rehabilitation Clinical Research Center, Jacksonville, FL)

This research is partially supported by the University of Florida Claude D. Pepper Older Americans Independence Center (1 P30 AG028740).

**University of Pittsburgh, Pittsburgh, PA**

Anne B. Newman, MD, MPH – Field Center Principal Investigator  
Stephanie A. Studenski, MD, MPH – Field Center Co-Investigator  
Bret H. Goodpaster, PhD  
Oscar Lopez, MD  
Nancy W. Glynn, PhD  
Neelesh K. Nadkarni, MD, PhD  
Diane G. Ives, MPH  
Mark A. Newman, PhD  
George Grove, MS  
Kathy Williams, RN, BSEd, MHSA  
Janet T. Bonk, MPH, RN

Jennifer Rush, MPH  
Piera Kost, BA (deceased)  
Pamela Vincent, CMA  
Allison Gerger, BS  
Jamie R. Romeo, BS  
Lauren C. Monheim, BS

The Pittsburgh Field Center is partially supported by the Pittsburgh Claude D. Pepper Older Americans Independence Center (P30 AG024827).

**Wake Forest University, Winston Salem, NC**

Stephen B. Kritchevsky, Ph.D. – Field Center Principal Investigator  
Anthony P. Marsh, PhD – Field Center Co-Principal Investigator  
Tina E. Brinkley, PhD  
Jamehl S. Demons, MD  
Kaycee M. Sink, MD, MAS  
Kimberly Kennedy, BA, CCRC  
Rachel Shertzer-Skinner, MA, CCRC  
Abbie Wrights, MS  
Rose Fries, RN, CCRC  
Deborah Barr, MA, RHEd, CHES

The Wake Forest University Field Center is, in part, supported by the Claude D. Pepper Older Americans Independence Center (1 P30 AG21332).

**Yale University, New Haven, CT**

Thomas M. Gill, M.D. – Field Center Principal Investigator  
Robert S. Axtell, PhD, FACSM – Field Center Co-Principal Investigator (Southern Connecticut State University, Exercise Science Department)  
Susan S. Kashaf, MD, M.P.H. (VA Connecticut Healthcare System)  
Nathalie de Rekeneire, MD, MS  
Joanne M. McGloin, MDiv, MS, MBA  
Raeleen Mautner, PhD  
Sharon M. Huie-White, MPH  
Luann Bianco, BA  
Janice Zocher  
Karen C. Wu, RN  
Denise M. Shepard, RN, MBA  
Barbara Fennelly, MA, RN  
Rina Castro, LPN  
Sean Halpin, MA  
Matthew Brennan, MA  
Theresa Barnett, MS, APRN  
Lynne P. Iannone, MS, CCRP  
Maria A. Zenoni, M.S.  
Julie A. Bugaj, MS  
Christine Bailey, MA  
Peter Charpentier, MPH  
Geraldine Hawthorne-Jones  
Bridget Mignosa  
Lynn Lewis

Dr. Gill is the recipient of an Academic Leadership Award (K07AG3587) from the National Institute on Aging.

The Yale Field Center is partially supported by the Claude D. Pepper Older Americans Independence Center (P30AG021342).

**Cognition Coordinating Center, Wake Forest University, Winston Salem, NC**

Jeff Williamson, MD, MHS – Center Principal Investigator

Kaycee M Sink, MD, MAS – Center Co-Principal Investigator

Hugh C. Hendrie, MB, ChB, DSc (Indiana University)

Stephen R. Rapp, PhD

Joe Verghese, MB, BS (Albert Einstein College of Medicine of Yeshiva University)

Nancy Woolard

Mark Espeland, PhD

Janine Jennings, PhD

Valerie K. Wilson, MD

**Electrocardiogram Reading Center, University of Florida, Gainesville, FL**

Carl J. Pepine MD, MACC

Mario Ariet, PhD

Eileen Handberg, PhD, ARNP

Daniel Deluca, BS

James Hill, MD, MS, FACC

Anita Szady, MD

**Spirometry Reading Center, Yale University, New Haven, CT**

Geoffrey L. Chupp, MD

Gail M. Flynn, RCP, CRFT

Thomas M. Gill, MD

John L. Hankinson, PhD (Hankinson Consulting, Inc.)

Carlos A. Vaz Fragoso, MD

Dr. Fragoso is the recipient of a Career Development Award from the Department of Veterans Affairs.

**Cost Effectiveness Analysis Center**

Erik J. Groessl, PhD (University of California, San Diego and VA San Diego Healthcare System)

Robert M. Kaplan, PhD (Office of Behavioral and Social Sciences Research, National Institutes of Health)

The Authors are grateful to the participants and their extensive contributions, which made these seminal trials possible.
